# Supplementary material
Source: PubMed Central journal article supplement (PMC4366613)

A

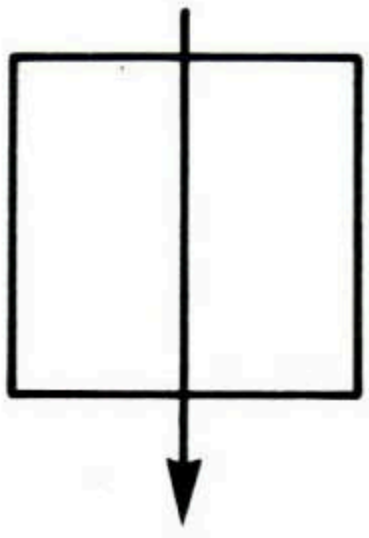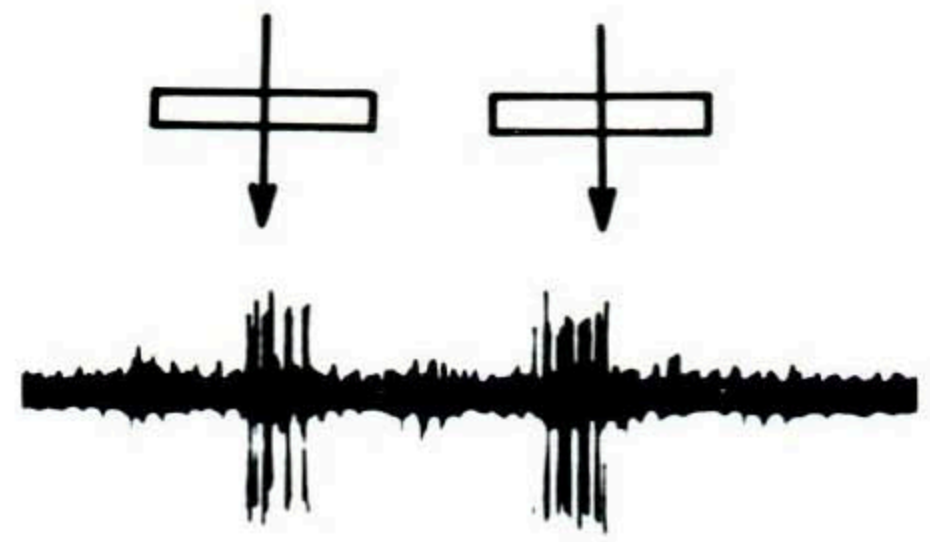

B

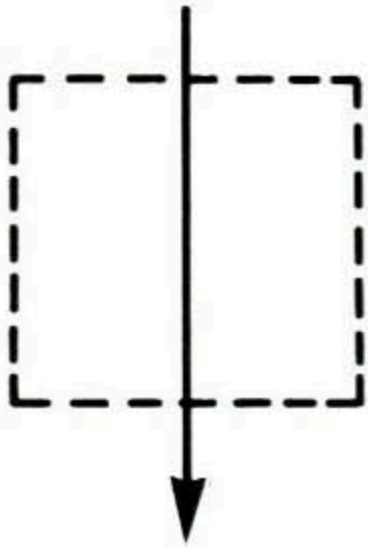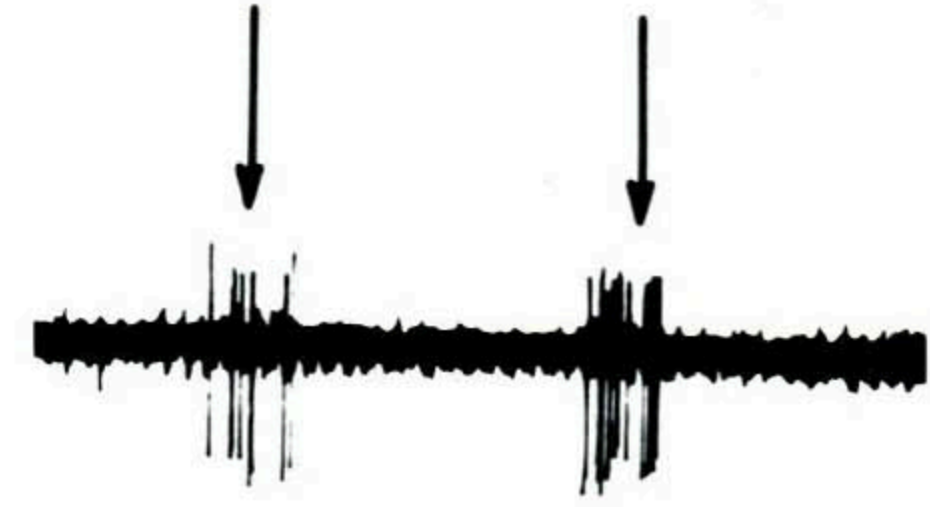

C

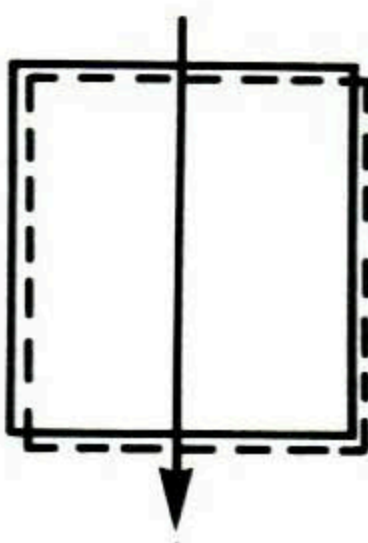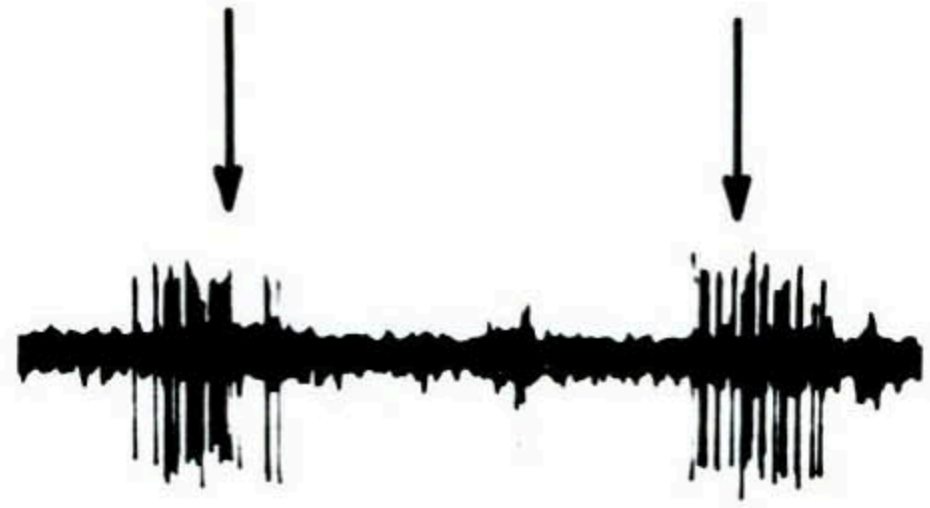

D

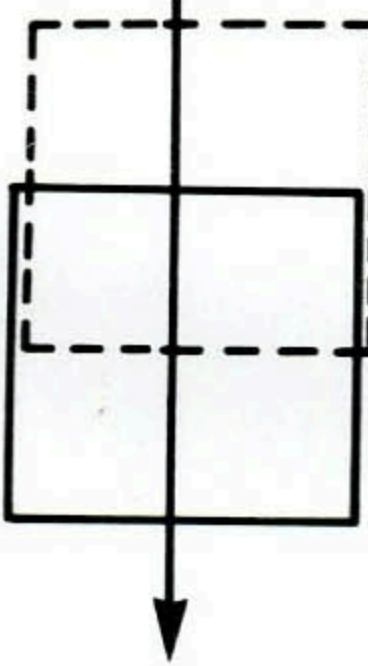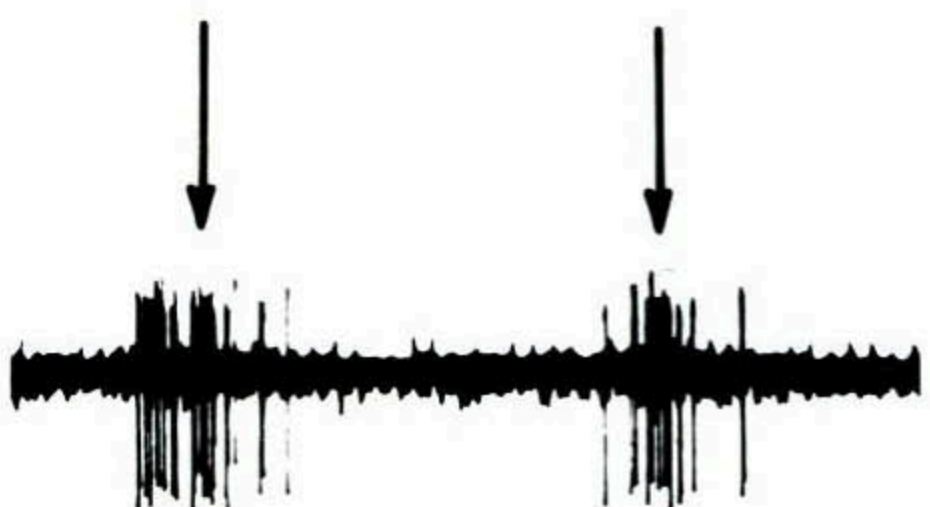

E

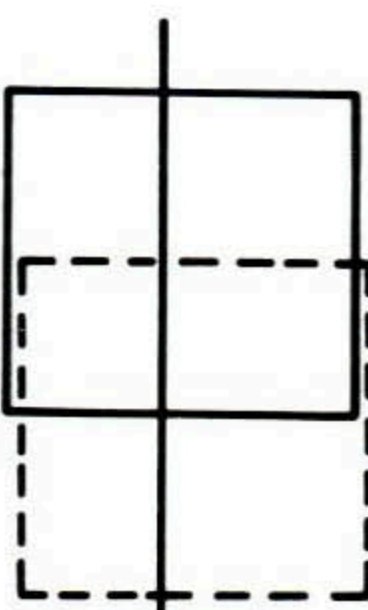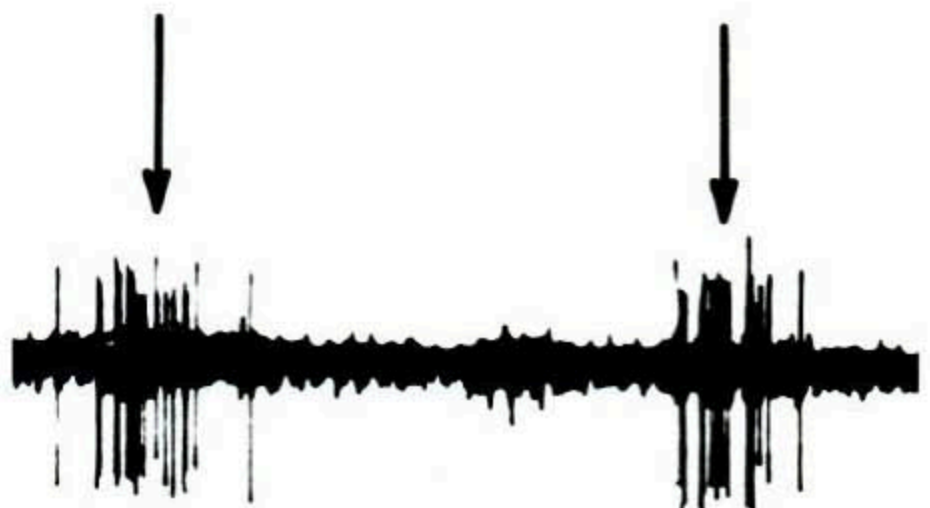

F

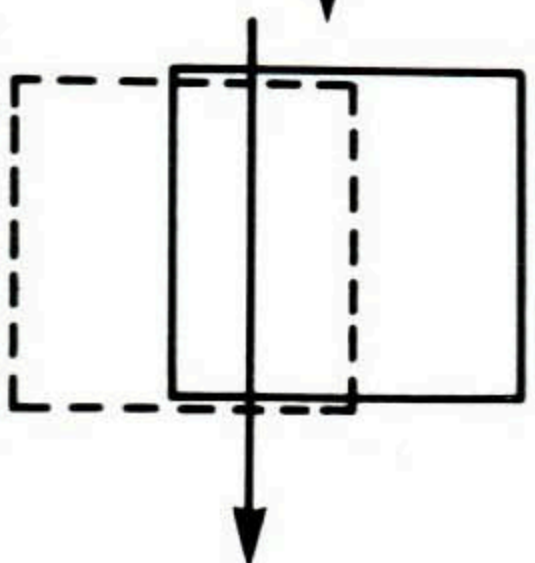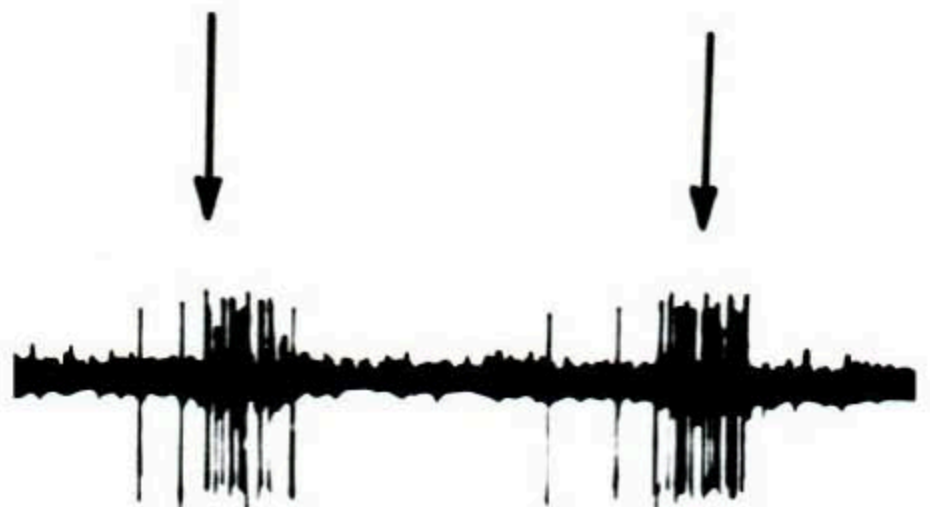

G

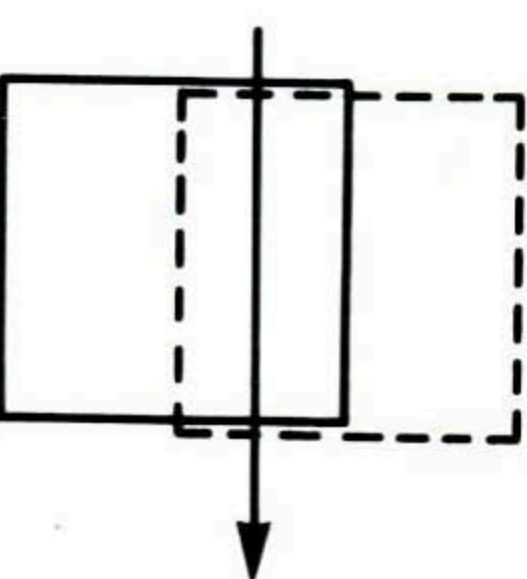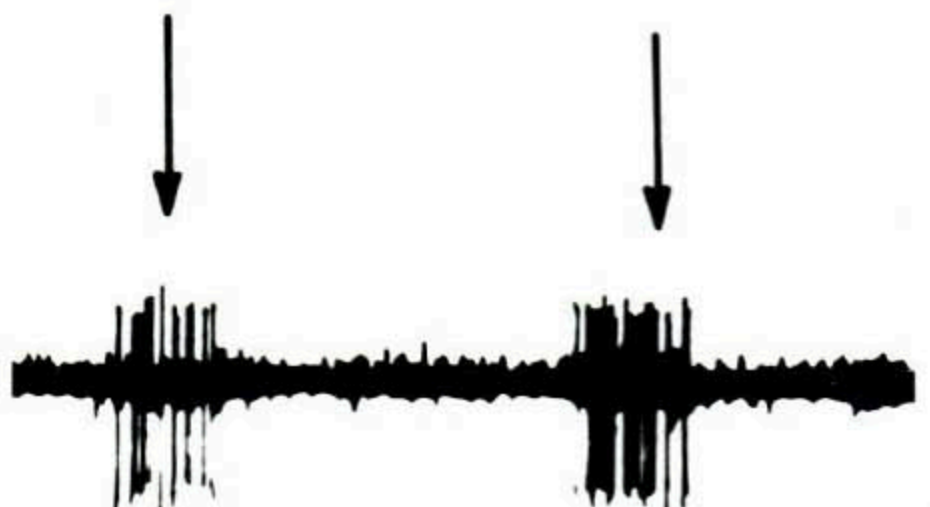

Supplement: supp_bht288_bht288supp_fig1.pdf [file supp_bht288_bht288supp_fig1.pdf]

A

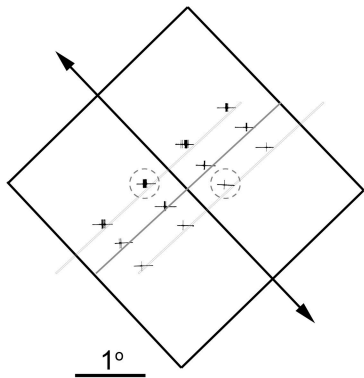

B

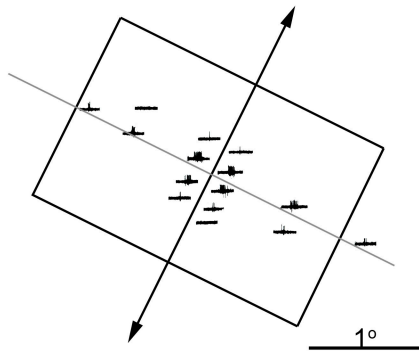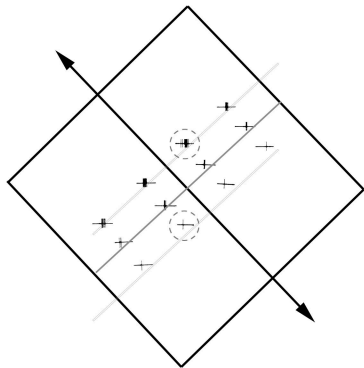

Supplement: supp_bht288_bht288supp_fig2.pdf [file supp_bht288_bht288supp_fig2.pdf]

**A**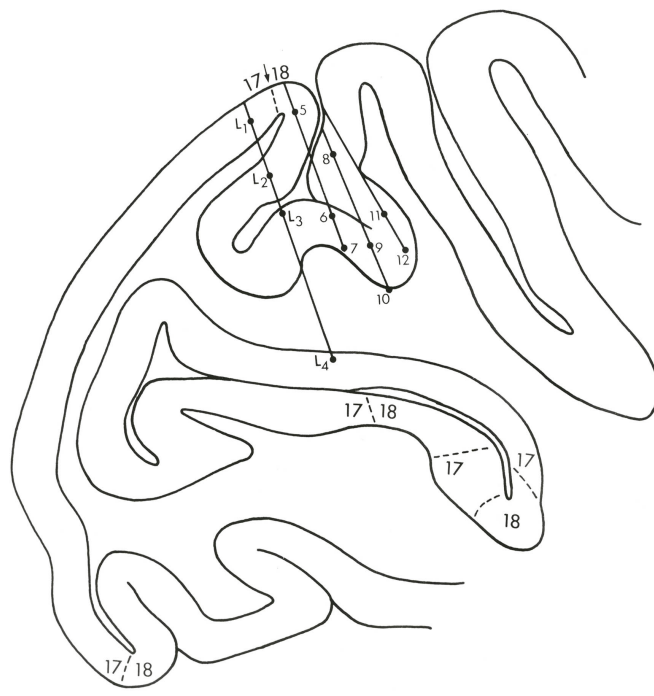**B**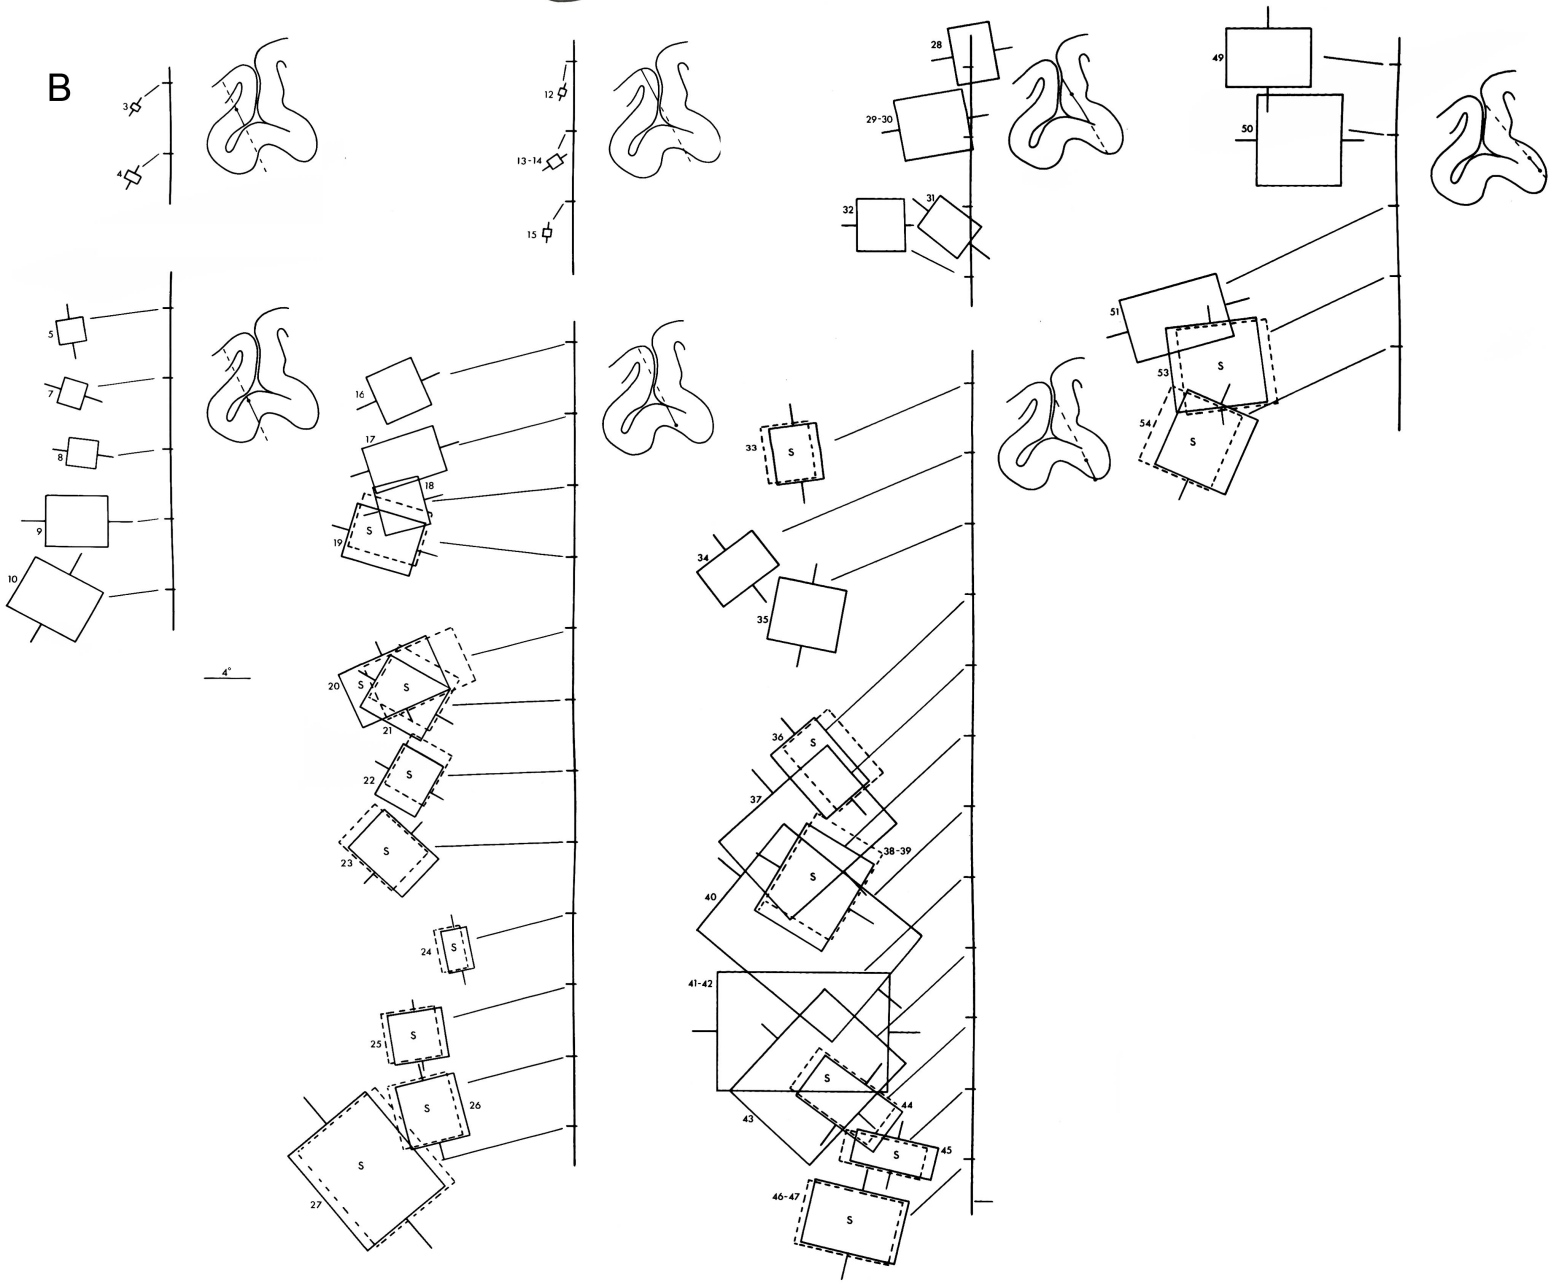

Supplement: supp_bht288_bht288supp_fig3.pdf [file supp_bht288_bht288supp_fig3.pdf]

**A**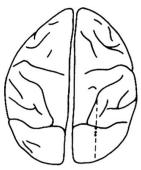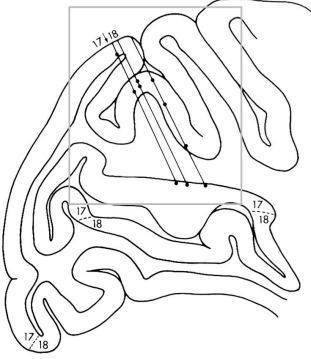**B**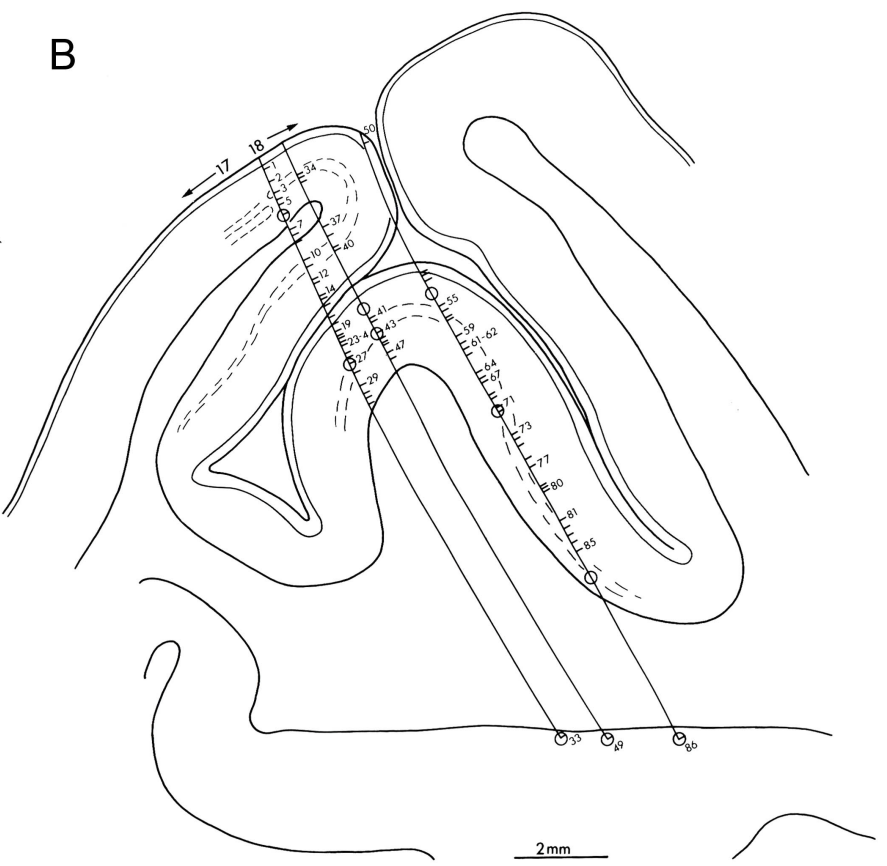**C**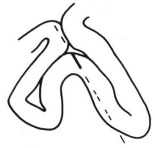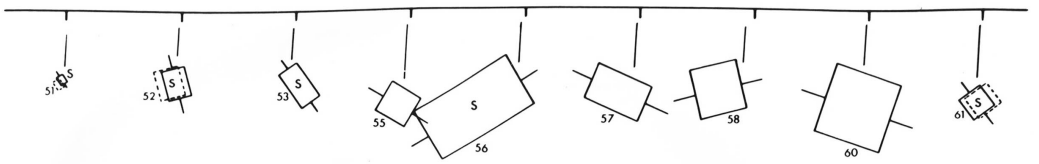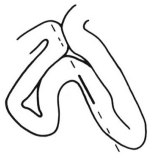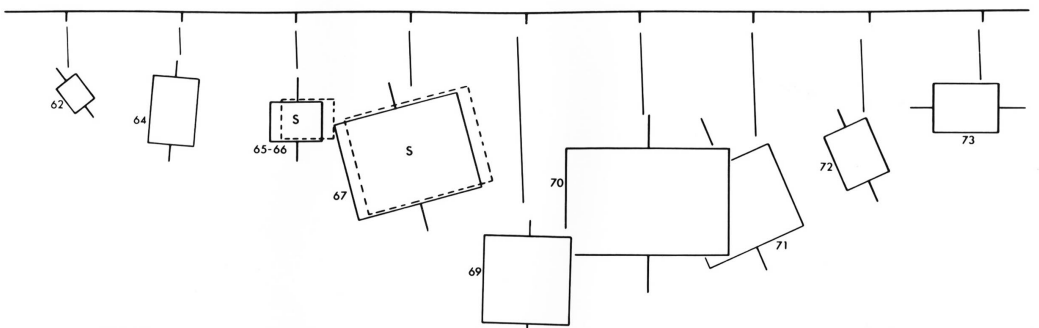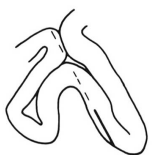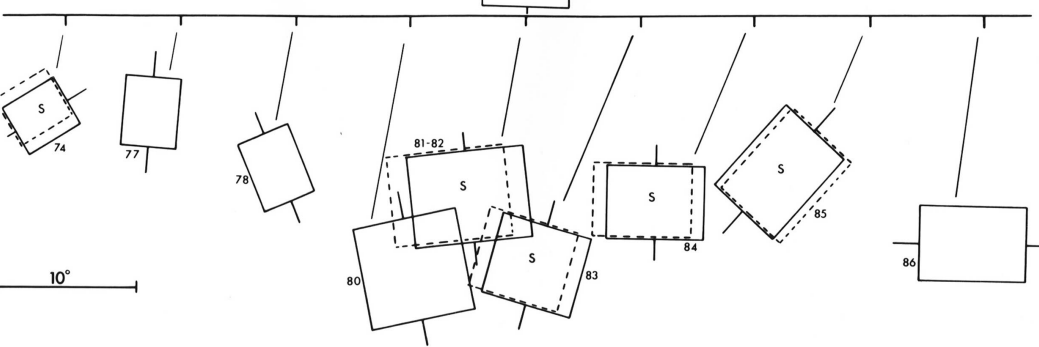

Supplement: supp_bht288_bht288supp_fig4.pdf [file supp_bht288_bht288supp_fig4.pdf]

A

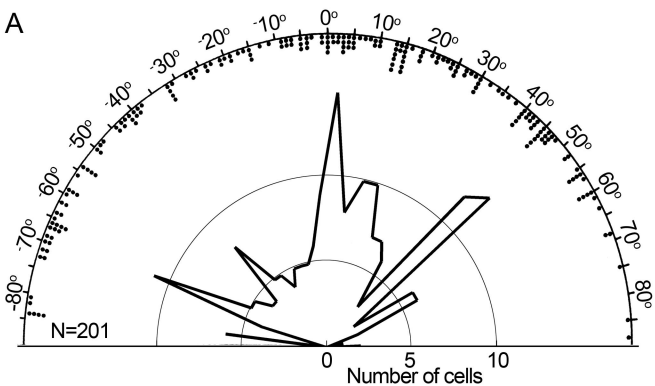

B

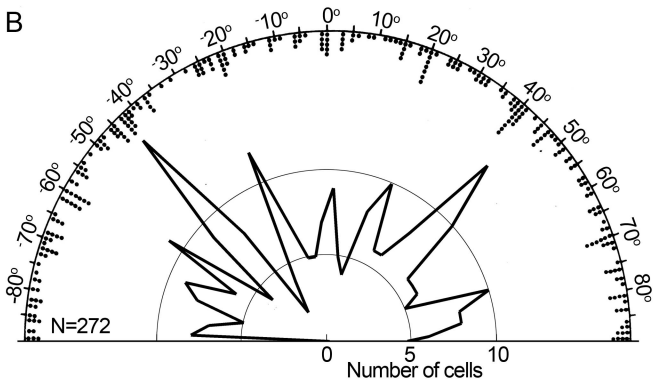

Supplement: supp_bht288_bht288supp_fig5.pdf [file supp_bht288_bht288supp_fig5.pdf]
